# Supplementary material for: The direct identification of quantum cutting in Tm3+ ions and energy transfer in the Tm3+/Yb3+ system based on a Ba2Gd2Si4O13 oxide host
Source: Royal Society of Chemistry journal article supplement (doi:10.1039/d1qi01327k), 2021-12-24
Supplement: d1qi01327k1.pdf [file d1qi01327k1.pdf]

The direct identification of quantum cutting in  $\text{Tm}^{3+}$  ion and energy  
transfer in  $\text{Tm}^{3+}/\text{Yb}^{3+}$  system based on  $\text{Ba}_2\text{Gd}_2\text{Si}_4\text{O}_{13}$  oxide host

Jia Zhang<sup>a,b,\*</sup>, Yuqing Pei<sup>a</sup>, Chunlin Ma<sup>a</sup>, Yining Zhang<sup>a</sup>

<sup>a</sup>Physics department and Jiangsu Key Laboratory of Modern Measurement  
Technology and Intelligence, Huaiyin Normal University, 111 West Chang Jiang  
Road, Huai'an 223300, China

<sup>b</sup>Jiangsu Key Laboratory for Chemistry of Low-Dimensional Materials, Huaiyin  
Normal University, 111 West Chang Jiang Road, Huai'an 223300, China

\*Corresponding author.

E-mail address: zhangjianew@126.com

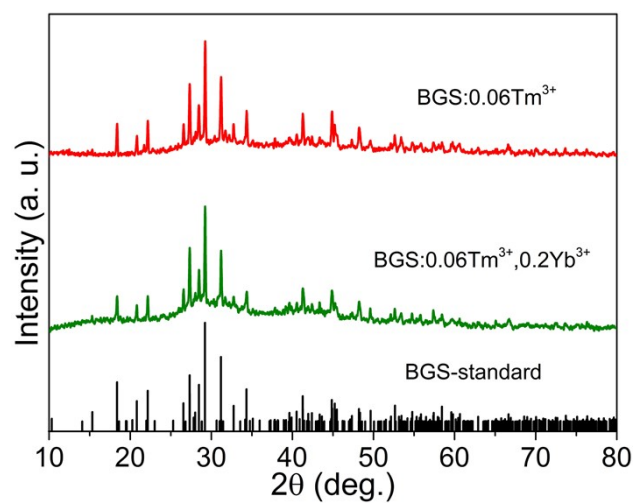

Figure S1 XRD patterns of BGS:0.06Tm<sup>3+</sup> and BGS:0.06Tm<sup>3+</sup>,0.2Yb<sup>3+</sup>

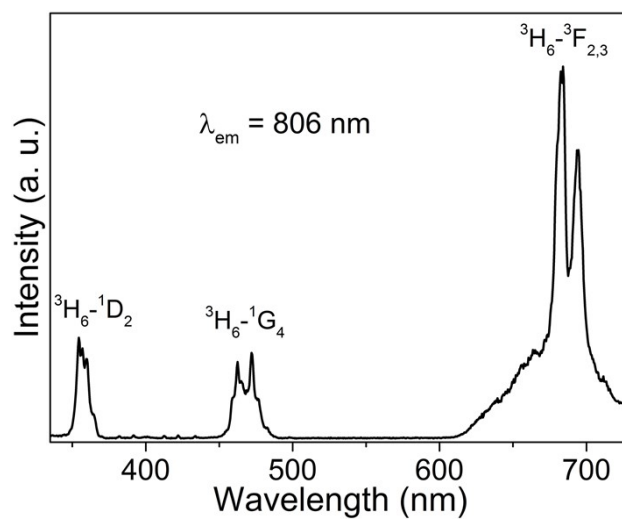

Figure S2 Excitation spectrum of BGS:0.06Tm<sup>3+</sup> monitored at 806 nm

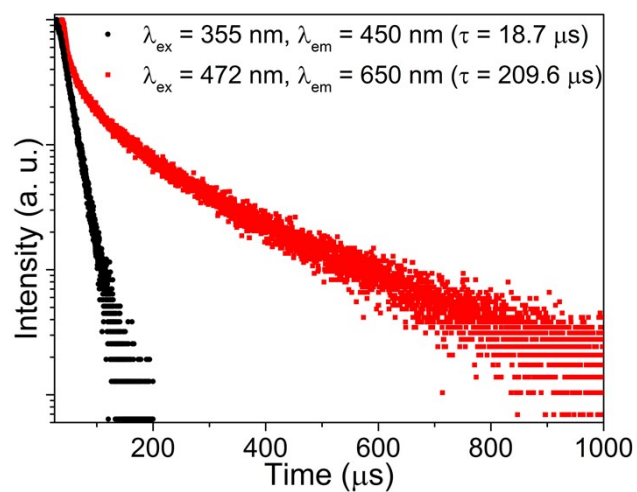

Figure S3 Decay curves of BGS:0.06Tm<sup>3+</sup>

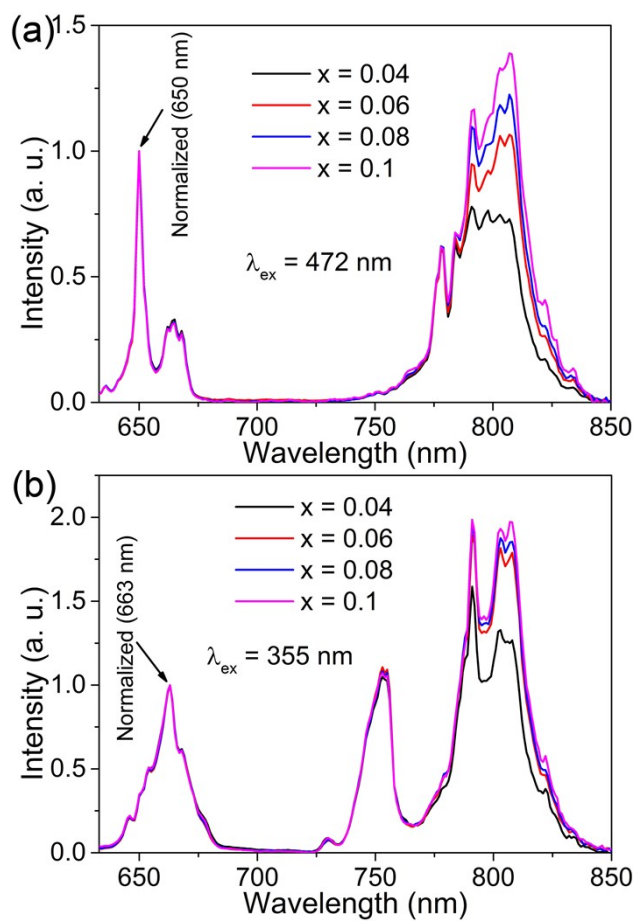

Figure S4 Normalized emission spectra of BGS:xTm<sup>3+</sup> ( $0.04 \leq x \leq 0.1$ ) under (a) 472  
and (b) 355 nm excitation

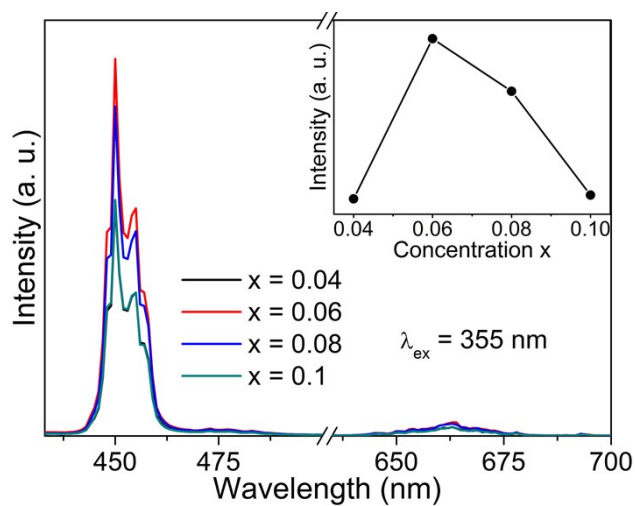

Figure S5 Emission spectra of BGS:xTm<sup>3+</sup> ( $0.04 \leq x \leq 0.1$ ) under 355 nm excitation, inset shows the dependence of 450 nm emission intensity on Tm<sup>3+</sup> concentration

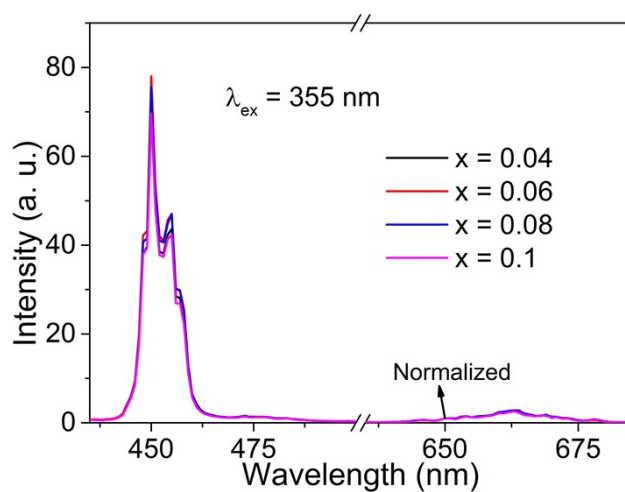

Figure S6 Normalized (for 650 nm) emission spectra of BGS:xTm<sup>3+</sup> ( $0.04 \leq x \leq 0.1$ ) under 355 nm excitation

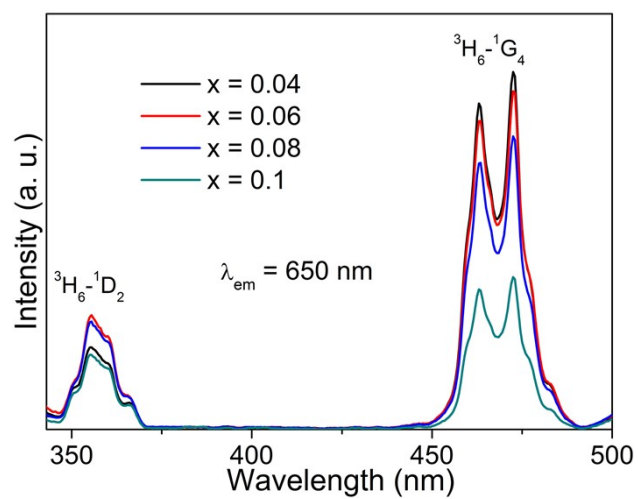

Figure S7 Excitation spectra of BGS:xTm<sup>3+</sup> ( $0.04 \leq x \leq 0.1$ ) monitored at 650 nm

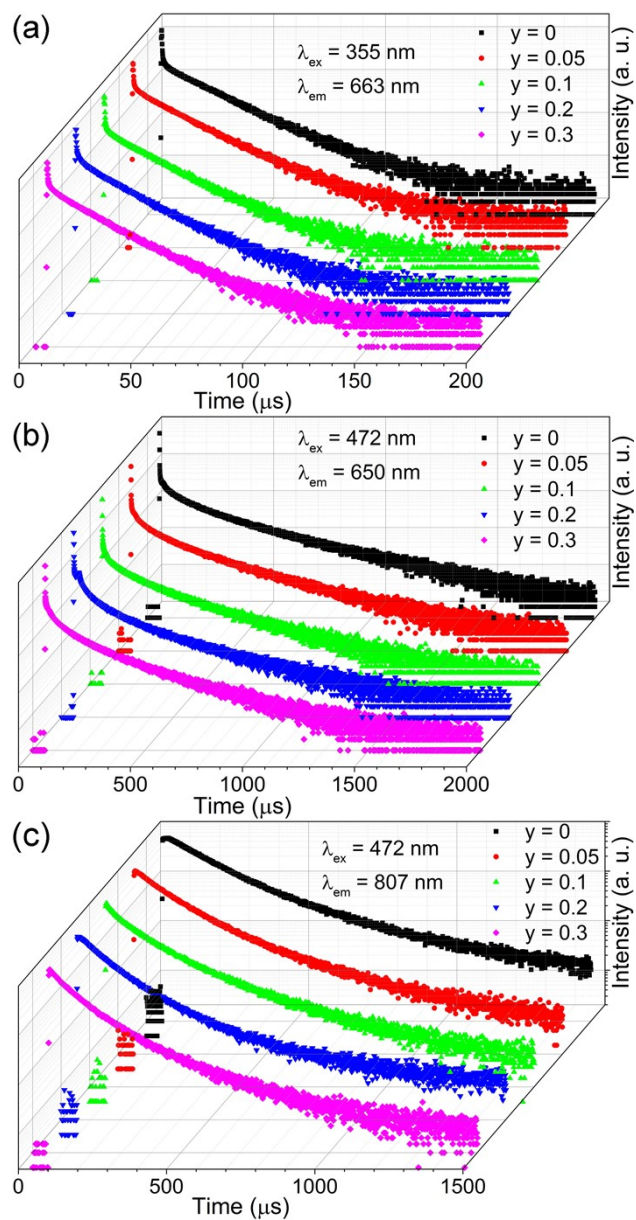

Figure S8 Decay curves of BGS:0.06Tm<sup>3+</sup>,yYb<sup>3+</sup> ( $0 \leq y \leq 0.3$ ) measured under different conditions: (a)  $\lambda_{\text{ex}} = 355 \text{ nm}$ ,  $\lambda_{\text{em}} = 663 \text{ nm}$ ; (b)  $\lambda_{\text{ex}} = 472 \text{ nm}$ ,  $\lambda_{\text{em}} = 650 \text{ nm}$ ; (c)  $\lambda_{\text{ex}} = 472 \text{ nm}$ ,  $\lambda_{\text{em}} = 807 \text{ nm}$

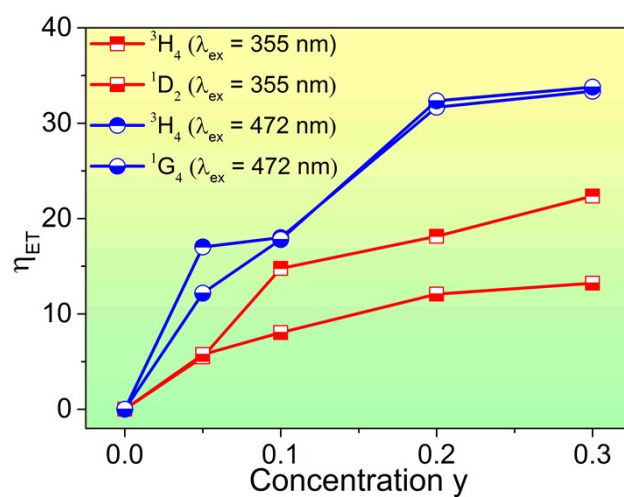

Figure S9 ET efficiencies ( $\eta_{\text{ET}}$ ) of BGS:0.06Tm<sup>3+</sup>,yYb<sup>3+</sup> ( $0 \leq y \leq 0.3$ ) from different excited states of Tm<sup>3+</sup> to Yb<sup>3+</sup> excited by different wavelengths

Table S1  $\tau_i$  and  $B_i$  ( $i = 1, 2$ ) values of the decay curves for BGS:0.06Tm<sup>3+</sup>

| $\lambda_{\text{ex}}$ (nm) | $\lambda_{\text{em}}$ (nm) | $\tau_1$ ( $\mu\text{s}$ ) | $\tau_2$ ( $\mu\text{s}$ ) | $B_1$  | $B_2$  |
|----------------------------|----------------------------|----------------------------|----------------------------|--------|--------|
| 355                        | 807                        | 75.0                       | -                          | 2648.0 | -      |
| 472                        | 807                        | 115.5                      | 301.2                      | 7986.3 | 1363.6 |
| 683                        | 807                        | 71.2                       | -                          | 1979.1 | -      |
| 355                        | 450                        | 18.7                       | -                          | 4213.8 | -      |
| 472                        | 650                        | 209.6                      | -                          | 2092.7 | -      |

Table S2  $\tau_i$  and  $B_i$  ( $i = 1, 2$ ) values of the decay curves for BGS:0.06Tm<sup>3+</sup>,yYb<sup>3+</sup> ( $0 \leq y \leq 0.3$ ) by exciting at 472 nm and monitoring 807 nm

| y    | $\tau_1$ ( $\mu\text{s}$ ) | $\tau_2$ ( $\mu\text{s}$ ) | $B_1$  | $B_2$  |
|------|----------------------------|----------------------------|--------|--------|
| 0    | 115.5                      | 301.2                      | 7986.3 | 1363.6 |
| 0.05 | 90.7                       | 242.9                      | 7299.8 | 1438.3 |
| 0.1  | 75.2                       | 214.0                      | 5320.7 | 1717.2 |
| 0.2  | 76.7                       | 210.7                      | 7349.2 | 1193.0 |
| 0.3  | 70.2                       | 197.4                      | 6402.3 | 1241.1 |
